# Supplementary material
Source: MDPI journal article supplement (https://www.mdpi.com/1999-4907/12/5/624)
Supplement: s1 [file s1]

## Supplementary Materials

### Temperature sensitivity of CO<sub>2</sub> and CH<sub>4</sub> fluxes from coarse woody debris in northern boreal forests.

**Authors:** Mukhortova, L., Pashenova, N., Meteleva, M., Krivobokov, L., Guggenberger, G.

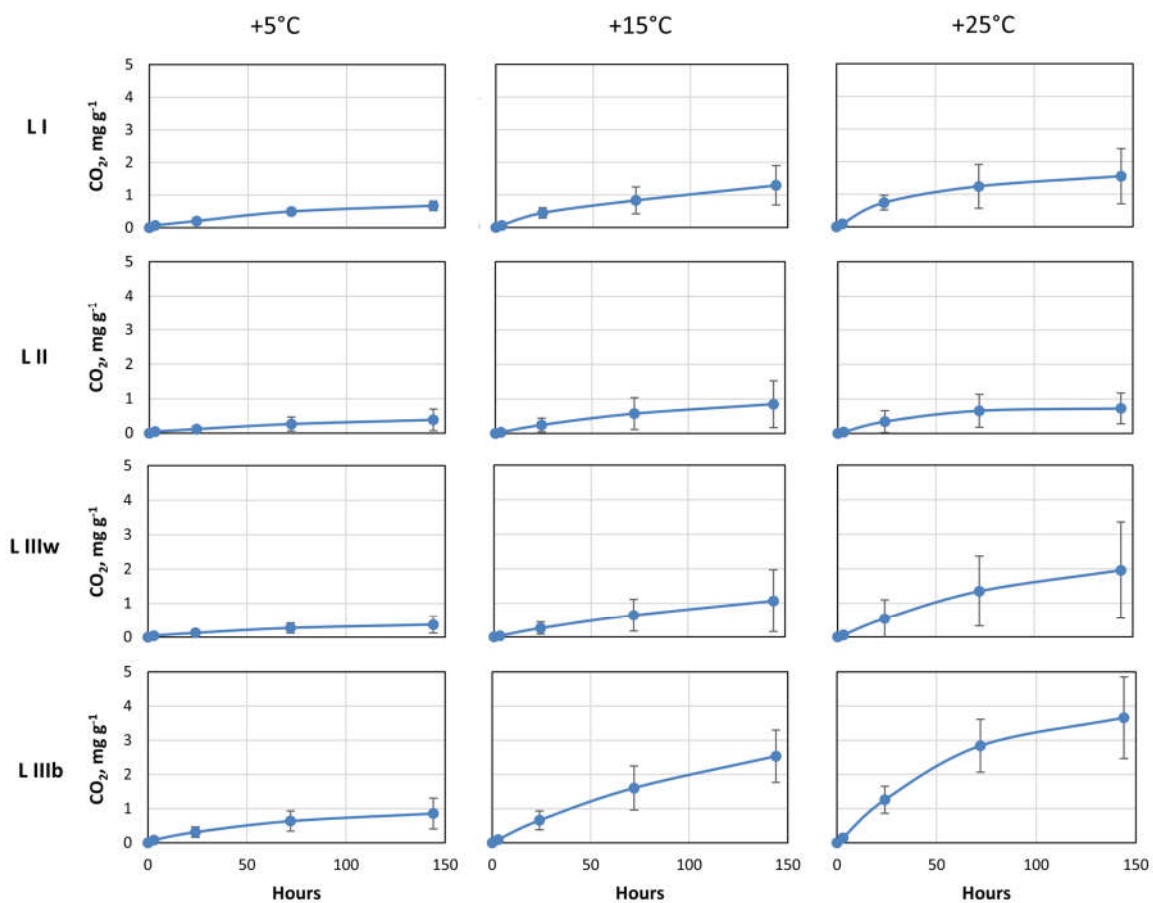

**Figure S1.** Cumulative CO<sub>2</sub> production during decomposition of larch wood: L I – L III – decomposition classes of larch wood; L IIIw and L IIIb – larch wood at DCIII decomposed by white and brown rot fungi respectively. The error bars indicate average deviation from the mean values calculated for three-seven samples taken from different logs of the same DC.

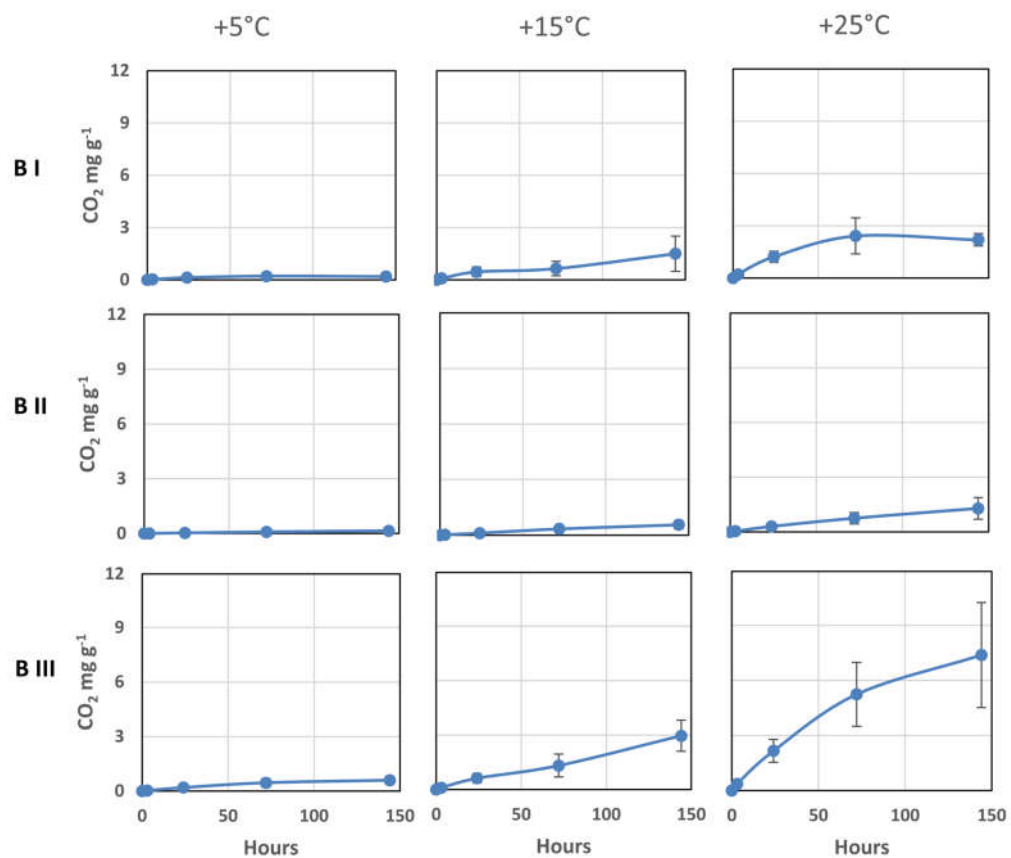

**Figure S2.** Cumulative CO<sub>2</sub> production during decomposition of birch wood: B I – B III – decomposition classes of birch wood. The error bars indicate average deviation from the mean values calculated for three samples taken from different logs of the same DC.

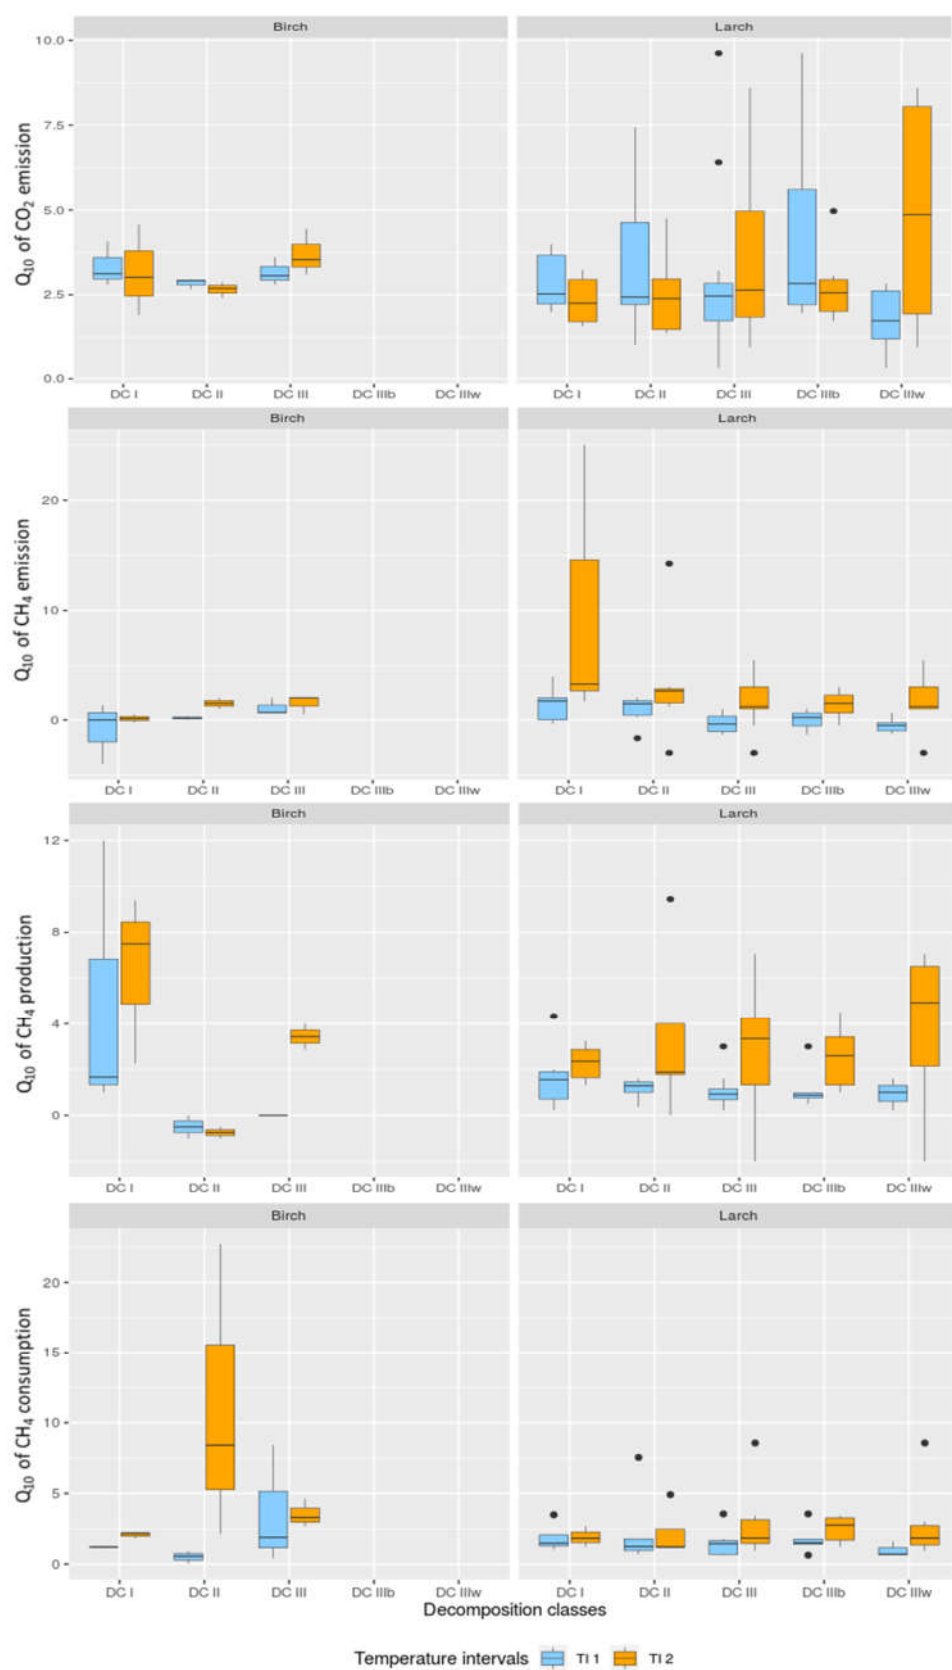

**(a)** **(b)**

**Figure S3.** Box plots of temperature coefficient  $Q_{10}$  of  $CO_2$  and  $CH_4$  fluxes from birch (a) and larch (b) wood of different classes of decomposition at two temperature intervals: TI 1 - +5°C to +15°C; TI 2 - +15°C to +25°C

**Table S1.** Analysis of covariance (ANCOVA) between CO<sub>2</sub> and CH<sub>4</sub> fluxes and the explaining variables in the laboratory incubation experiment

| ANCOVA             | CO <sub>2</sub> emission (µg g <sup>-1</sup> h <sup>-1</sup> )<br>R <sup>2</sup> =0.62*** |          |                    | CH <sub>4</sub> flux (µg g <sup>-1</sup> h <sup>-1</sup> )<br>R <sup>2</sup> =0.33*** |          |                    | CH <sub>4</sub> production (µg g <sup>-1</sup> h <sup>-1</sup> )<br>R <sup>2</sup> =0.51*** |          |                    | CH <sub>4</sub> consumption (µg g <sup>-1</sup> h <sup>-1</sup> )<br>R <sup>2</sup> =0.55*** |          |                    |
|--------------------|-------------------------------------------------------------------------------------------|----------|--------------------|---------------------------------------------------------------------------------------|----------|--------------------|---------------------------------------------------------------------------------------------|----------|--------------------|----------------------------------------------------------------------------------------------|----------|--------------------|
|                    | <i>F</i>                                                                                  | <i>P</i> | <i>Eta-squared</i> | <i>F</i>                                                                              | <i>P</i> | <i>Eta-squared</i> | <i>F</i>                                                                                    | <i>P</i> | <i>Eta-squared</i> | <i>F</i>                                                                                     | <i>P</i> | <i>Eta-squared</i> |
| Intercept          | 2.9                                                                                       | n.s      |                    | 7.8                                                                                   | **       |                    | 11.0                                                                                        | ***      |                    | 1.1                                                                                          | n.s      |                    |
| Density            | 5.2                                                                                       | *        | 0.020              | 8.0                                                                                   | **       | 0.064              | 15.9                                                                                        | ***      | 0.075              | 3.3                                                                                          | n.s      | 0.016              |
| Moisture           | 24.2                                                                                      | ***      | 0.094              | 0.3                                                                                   | n.s      | 0.002              | 11.5                                                                                        | ***      | 0.054              | 20.3                                                                                         | ***      | 0.101              |
| Moisture^2         | 25.8                                                                                      | ***      | 0.100              | 0.0                                                                                   | n.s      | 0.000              | 12.4                                                                                        | ***      | 0.058              | 18.2                                                                                         | ***      | 0.091              |
| Species            | 1.1                                                                                       | n.s      | 0.004              | 1.1                                                                                   | n.s      | 0.009              | 2.6                                                                                         | n.s      | 0.012              | 0.7                                                                                          | n.s      | 0.004              |
| Decay class (DC)   | 7.0                                                                                       | ***      | 0.054              | 5.3                                                                                   | **       | 0.084              | 9.2                                                                                         | ***      | 0.087              | 3.6                                                                                          | *        | 0.036              |
| Temperature (Temp) | 27.9                                                                                      | ***      | 0.216              | 2.3                                                                                   | n.s      | 0.036              | 17.5                                                                                        | ***      | 0.164              | 12.7                                                                                         | ***      | 0.126              |
| Species×DC         | 4.7                                                                                       | *        | 0.036              | 0.3                                                                                   | n.s      | 0.006              | 4.0                                                                                         | *        | 0.037              | 3.5                                                                                          | *        | 0.035              |
| Species×Temp       | 3.3                                                                                       | *        | 0.025              | 0.2                                                                                   | n.s      | 0.004              | 2.6                                                                                         | n.s      | 0.024              | 3.9                                                                                          | *        | 0.039              |
| DC×Temp            | 4.5                                                                                       | ***      | 0.070              | 1.6                                                                                   | n.s      | 0.050              | 1.5                                                                                         | n.s      | 0.028              | 3.9                                                                                          | **       | 0.078              |
| Species×DC×Temp    | 1.7                                                                                       | n.s      | 0.026              | 0.4                                                                                   | n.s      | 0.012              | 1.5                                                                                         | n.s      | 0.028              | 1.0                                                                                          | n.s      | 0.019              |
| Error              |                                                                                           |          | 0.356              |                                                                                       |          | 0.733              |                                                                                             |          | 0.433              |                                                                                              |          | 0.457              |

\*  $P<0.05$ , \*\*  $P<0.01$ , \*\*\* $P<0.005$ , n.s. - not significant

CO<sub>2</sub> – the rate of CO<sub>2</sub> flux; CH<sub>4</sub> measured – the measured rate of CH<sub>4</sub> flux; CH<sub>4</sub> calculated – the rate of CH<sub>4</sub> flux calculated based on <sup>13</sup>CH<sub>4</sub> accumulation; CH<sub>4</sub> consumption – the rate of methane consumption calculated as difference between CH<sub>4</sub> calculated and CH<sub>4</sub> measured

**Table S2.** Analysis of covariance (ANCOVA) between CO<sub>2</sub> and CH<sub>4</sub> fluxes and the explaining variables separately for decomposition of larch and birch CWD

| ANCOVA             | CO <sub>2</sub> emission (μg g <sup>-1</sup> h <sup>-1</sup> ) |          |                    | CH <sub>4</sub> flux (μg g <sup>-1</sup> h <sup>-1</sup> ) |          |                    | CH <sub>4</sub> production (μg g <sup>-1</sup> h <sup>-1</sup> ) |          |                    | CH <sub>4</sub> consumption (μg g <sup>-1</sup> h <sup>-1</sup> ) |          |                    |
|--------------------|----------------------------------------------------------------|----------|--------------------|------------------------------------------------------------|----------|--------------------|------------------------------------------------------------------|----------|--------------------|-------------------------------------------------------------------|----------|--------------------|
|                    | <i>F</i>                                                       | <i>P</i> | <i>Eta-squared</i> | <i>F</i>                                                   | <i>P</i> | <i>Eta-squared</i> | <i>F</i>                                                         | <i>P</i> | <i>Eta-squared</i> | <i>F</i>                                                          | <i>P</i> | <i>Eta-squared</i> |
| Larch CWD          |                                                                |          |                    |                                                            |          |                    |                                                                  |          |                    |                                                                   |          |                    |
|                    | <i>R</i> <sup>2</sup> =0.51***                                 |          |                    | <i>R</i> <sup>2</sup> =0.28***                             |          |                    | <i>R</i> <sup>2</sup> =0.44***                                   |          |                    | <i>R</i> <sup>2</sup> =0.44***                                    |          |                    |
| Intercept          | 0.1                                                            | n.s      |                    | 8.4                                                        | ***      |                    | 5.7                                                              | *        |                    | 0.0                                                               | n.s      |                    |
| Density            | 1.9                                                            | n.s      | 0.015              |                                                            |          |                    |                                                                  |          | 0.081              | 1.0                                                               | n.s      | 0.009              |
| Moisture           | 17.0                                                           | ***      | 0.132              | 0.0                                                        | n.s      | 0.000              | 11.2                                                             | ***      | 0.087              | 14.5                                                              | ***      | 0.134              |
| Moisture^2         | 9.3                                                            | ***      | 0.072              | 0.1                                                        | n.s      | 0.001              | 7.0                                                              | *        | 0.054              | 7.7                                                               | **       | 0.071              |
| Decay class (DC)   | 0.9                                                            | n.s      | 0.014              | 7.9                                                        | ***      | 0.146              | 6.5                                                              | ***      | 0.100              | 0.0                                                               | n.s      | 0.001              |
| Temperature (Temp) | 10.7                                                           | ***      | 0.167              | 3.1                                                        | *        | 0.058              | 6.5                                                              | ***      | 0.101              | 2.2                                                               | n.s      | 0.041              |
| DC×Temp            | 0.7                                                            | n.s      | 0.023              | 1.1                                                        | n.s      | 0.039              | 0.2                                                              | n.s      | 0.005              | 1.7                                                               | n.s      | 0.064              |
| Error              |                                                                |          | 0.576              |                                                            |          | 0.684              |                                                                  |          | 0.572              |                                                                   |          | 0.680              |
| Birch CWD          |                                                                |          |                    |                                                            |          |                    |                                                                  |          |                    |                                                                   |          |                    |
|                    | <i>R</i> <sup>2</sup> =0.92***                                 |          |                    | <i>R</i> <sup>2</sup> =0.49                                |          |                    | <i>R</i> <sup>2</sup> =0.84***                                   |          |                    | <i>R</i> <sup>2</sup> =0.86***                                    |          |                    |
| Intercept          | 4.4                                                            | n.s      |                    | 2.1                                                        | n.s      |                    | 0.0                                                              | n.s      |                    | 3.1                                                               | n.s      |                    |
| Density            | 3.8                                                            | n.s      | 0.022              | 1.8                                                        | n.s      | 0.070              | 0.0                                                              | n.s      | 0.000              | 2.6                                                               | n.s      | 0.029              |
| Moisture           | 0.3                                                            | n.s      | 0.002              | 1.5                                                        | n.s      | 0.058              | 0.6                                                              | n.s      | 0.007              | 0.4                                                               | n.s      | 0.004              |
| Moisture^2         | 0.5                                                            | n.s      | 0.003              | 1.0                                                        | n.s      | 0.039              | 1.6                                                              | n.s      | 0.017              | 0.0                                                               | n.s      | 0.000              |
| Decay class (DC)   | 18.4                                                           | ***      | 0.214              | 0.1                                                        | n.s      | 0.007              | 8.3                                                              | ***      | 0.183              | 9.2                                                               | ***      | 0.203              |
| Temperature (Temp) | 40.2                                                           | ***      | 0.468              | 0.6                                                        | n.s      | 0.046              | 21.0                                                             | ***      | 0.463              | 18.1                                                              | ***      | 0.399              |
| DC×Temp            | 8.8                                                            | ***      | 0.204              | 1.3                                                        | n.s      | 0.199              | 3.7                                                              | *        | 0.165              | 4.5                                                               | *        | 0.200              |
| Error              |                                                                |          | 0.087              |                                                            |          | 0.581              |                                                                  |          | 0.165              |                                                                   |          | 0.165              |

Superscripts and name of fluxes are similar to the Table S1

**Table S3.** Analysis of covariance (ANCOVA) between CH<sub>4</sub> fluxes and the explaining variables (including rate of CO<sub>2</sub> emission) in the laboratory incubation experiment

| ANCOVA             | CH <sub>4</sub> flux (μg g <sup>-1</sup> h <sup>-1</sup> )<br><i>R</i> <sup>2</sup> =0.33 |          |                    | CH <sub>4</sub> production (μg g <sup>-1</sup> h <sup>-1</sup> )<br><i>R</i> <sup>2</sup> =0.72 |          |                    | CH <sub>4</sub> consumption (μg g <sup>-1</sup> h <sup>-1</sup> )<br><i>R</i> <sup>2</sup> =0.79 |          |                    |
|--------------------|-------------------------------------------------------------------------------------------|----------|--------------------|-------------------------------------------------------------------------------------------------|----------|--------------------|--------------------------------------------------------------------------------------------------|----------|--------------------|
|                    | <i>F</i>                                                                                  | <i>P</i> | <i>Eta-squared</i> | <i>F</i>                                                                                        | <i>P</i> | <i>Eta-squared</i> | <i>F</i>                                                                                         | <i>P</i> | <i>Eta-squared</i> |
| CO <sub>2</sub>    | 1.0                                                                                       | n.s      | 0.001              | 70.8                                                                                            | ***      | 0.354              | 107.5                                                                                            | ***      | 0.511              |
| Intercept          | 7.1                                                                                       | ***      |                    | 8.2                                                                                             | ***      |                    | 0.1                                                                                              | n.s      |                    |
| Density            | 7.0                                                                                       | ***      | 0.058              | 10.2                                                                                            | ***      | 0.051              | 0.0                                                                                              | n.s      | 0.000              |
| Moisture           | 0.4                                                                                       | n.s      | 0.003              | 0.0                                                                                             | n.s      | 0.000              | 1.3                                                                                              | n.s      | 0.006              |
| Moisture^2         | 0.1                                                                                       | n.s      | 0.001              | 0.0                                                                                             | n.s      | 0.000              | 0.5                                                                                              | n.s      | 0.002              |
| Species            | 1.0                                                                                       | n.s      | 0.008              | 1.5                                                                                             | n.s      | 0.008              | 0.0                                                                                              | n.s      | 0.000              |
| Decay class (DC)   | 4.9                                                                                       | ***      | 0.081              | 5.9                                                                                             | ***      | 0.059              | 0.0                                                                                              | n.s      | 0.000              |
| Temperature (Temp) | 1.4                                                                                       | n.s      | 0.023              | 2.1                                                                                             | n.s      | 0.021              | 0.3                                                                                              | n.s      | 0.003              |
| Species×DC         | 0.3                                                                                       | n.s      | 0.005              | 1.3                                                                                             | n.s      | 0.013              | 0.5                                                                                              | n.s      | 0.004              |
| Species×Temp       | 0.3                                                                                       | n.s      | 0.004              | 0.4                                                                                             | n.s      | 0.004              | 0.9                                                                                              | n.s      | 0.008              |
| DC×Temp            | 1.6                                                                                       | n.s      | 0.053              | 0.4                                                                                             | n.s      | 0.009              | 1.1                                                                                              | n.s      | 0.021              |
| Species×DC×Temp    | 0.4                                                                                       | n.s      | 0.012              | 1.3                                                                                             | n.s      | 0.026              | 0.6                                                                                              | n.s      | 0.012              |
| Error              |                                                                                           |          | 0.751              |                                                                                                 |          | 0.455              |                                                                                                  |          | 0.432              |

Superscripts and name of fluxes are similar to the Table S1
